# Supplementary material for: Multi-classifier prediction of knee osteoarthritis progression from incomplete imbalanced longitudinal data
Source: PubMed Central journal article supplement (PMC7242357; doi:10.1038/s41598-020-64643-8), 2020-05-21
Supplement: 41598_2020_64643_MOESM1_ESM.pdf [file 41598_2020_64643_MOESM1_ESM.pdf]

## Supplementary Information

### Multi-classifier prediction of knee osteoarthritis progression from incomplete imbalanced longitudinal data

P. Widera, P.M.J. Welsing, C. Ladel, J. Loughlin, F.P.J.G. Lafeber, F. Petit Dop, J. Larkin, H. Weinans, A. Mobasheri, and J. Bacardit

|                      | 33.3% size   |                | 66.7% size   |                | 100% size    |                |
|----------------------|--------------|----------------|--------------|----------------|--------------|----------------|
|                      | median       | 95% CI         | median       | 95% CI         | median       | 95% CI         |
| <b>knn</b>           | 0.325        | (0.308, 0.352) | 0.329        | (0.319, 0.350) | 0.338        | (0.327, 0.346) |
| <b>logreg</b>        | 0.361        | (0.331, 0.370) | 0.35         | (0.337, 0.364) | 0.364        | (0.339, 0.377) |
| <b>logreg-multi</b>  | 0.355        | (0.334, 0.367) | 0.377        | (0.348, 0.397) | 0.389        | (0.371, 0.418) |
| <b>random forest</b> | <b>0.399</b> | (0.378, 0.409) | <b>0.408</b> | (0.389, 0.427) | <b>0.425</b> | (0.411, 0.437) |
| <b>svc</b>           | 0.341        | (0.306, 0.352) | 0.341        | (0.322, 0.362) | 0.366        | (0.336, 0.396) |
| <b>svc-rbf</b>       | 0.36         | (0.318, 0.383) | 0.361        | (0.336, 0.379) | 0.365        | (0.350, 0.393) |

**Table S1.** Comparison of algorithm performance on balanced subsets of the **CHECK** dataset (corresponding to FIGURE 1A). We report the median F1-score and confidence intervals around median (from binomial distribution) across all subsets and CV-repeats, for selected training set sizes (3/9, 6/9, and 9/9).

|                      | 33.3% size   |                | 66.7% size  |                | 100% size    |                |
|----------------------|--------------|----------------|-------------|----------------|--------------|----------------|
|                      | median       | 95% CI         | median      | 95% CI         | median       | 95% CI         |
| <b>knn</b>           | 0.369        | (0.359, 0.379) | 0.38        | (0.378, 0.387) | 0.389        | (0.379, 0.396) |
| <b>logreg</b>        | 0.399        | (0.377, 0.402) | 0.415       | (0.400, 0.421) | 0.419        | (0.412, 0.425) |
| <b>logreg-multi</b>  | 0.31         | (0.298, 0.317) | 0.323       | (0.310, 0.339) | 0.338        | (0.322, 0.343) |
| <b>random forest</b> | <b>0.417</b> | (0.408, 0.431) | <b>0.43</b> | (0.425, 0.437) | <b>0.437</b> | (0.435, 0.443) |
| <b>svc</b>           | 0.36         | (0.341, 0.371) | 0.358       | (0.351, 0.362) | 0.375        | (0.363, 0.386) |
| <b>svc-rbf</b>       | 0.41         | (0.387, 0.419) | 0.412       | (0.398, 0.425) | 0.426        | (0.418, 0.435) |

**Table S2.** Comparison of algorithm performance on balanced subsets of the **OAI** dataset (corresponding to FIGURE 1B). We report the median F1-score and confidence intervals around median (from binomial distribution) across all subsets and CV-repeats, for selected training set sizes (3/9, 6/9, and 9/9).

|                   | 37.5% size   |                | 62.5% size   |                | 100% size    |                |
|-------------------|--------------|----------------|--------------|----------------|--------------|----------------|
|                   | median       | 95% CI         | median       | 95% CI         | median       | 95% CI         |
| <b>1vsR</b>       | 0.491        | (0.489, 0.491) | 0.498        | (0.497, 0.499) | 0.502        | (0.501, 0.502) |
| <b>duo</b>        | <b>0.494</b> | (0.493, 0.495) | <b>0.504</b> | (0.503, 0.505) | <b>0.507</b> | (0.506, 0.508) |
| <b>multilabel</b> | 0.489        | (0.488, 0.489) | 0.492        | (0.491, 0.493) | 0.496        | (0.495, 0.497) |
| <b>single</b>     | 0.485        | (0.484, 0.486) | 0.49         | (0.489, 0.491) | 0.494        | (0.493, 0.495) |

**Table S3.** Comparison of performance of multi-model / multi-label methods trained on the **CHECK** dataset (corresponding to FIGURE 3A). We report the median F1-score and confidence intervals around median (from binomial distribution) across all CV-repeats, for selected training set sizes (3/8, 5/8, and 8/8).

|                   | 42.9% size   |                | 71.4% size   |                | 100% size    |                |
|-------------------|--------------|----------------|--------------|----------------|--------------|----------------|
|                   | median       | 95% CI         | median       | 95% CI         | median       | 95% CI         |
| <b>1vsR</b>       | 0.64         | (0.640, 0.641) | 0.641        | (0.641, 0.641) | 0.642        | (0.642, 0.642) |
| <b>duo</b>        | <b>0.644</b> | (0.643, 0.644) | <b>0.645</b> | (0.644, 0.645) | <b>0.646</b> | (0.646, 0.646) |
| <b>multilabel</b> | 0.639        | (0.638, 0.639) | 0.639        | (0.639, 0.639) | 0.641        | (0.641, 0.641) |
| <b>single</b>     | 0.638        | (0.638, 0.639) | 0.639        | (0.639, 0.639) | 0.64         | (0.639, 0.640) |

**Table S4.** Comparison of performance of multi-model / multi-label methods trained on the **OAI** dataset (corresponding to FIGURE 3B). We report the median F1-score and confidence intervals around median (from binomial distribution) across all CV-repeats, for selected training set sizes (3/7, 5/7, and 7/7).

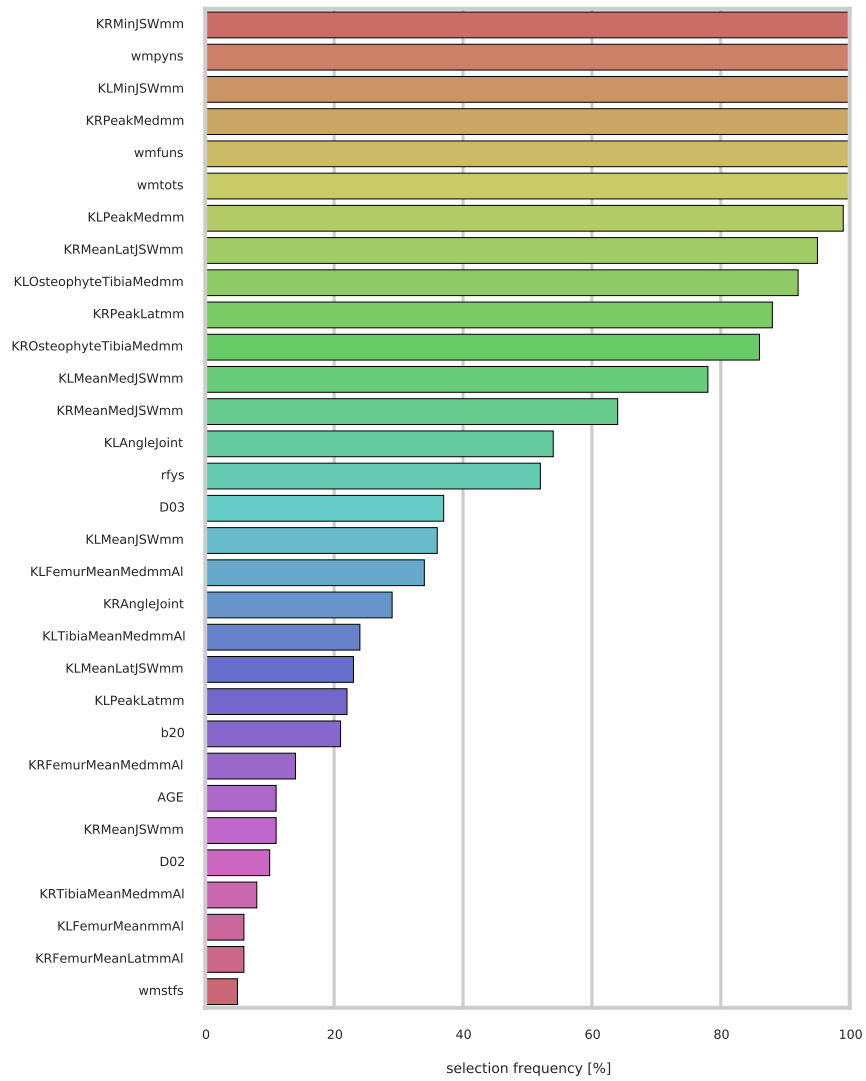

**Figure S1.** Frequency of feature selection with RFE procedure (**CHECK** dataset).

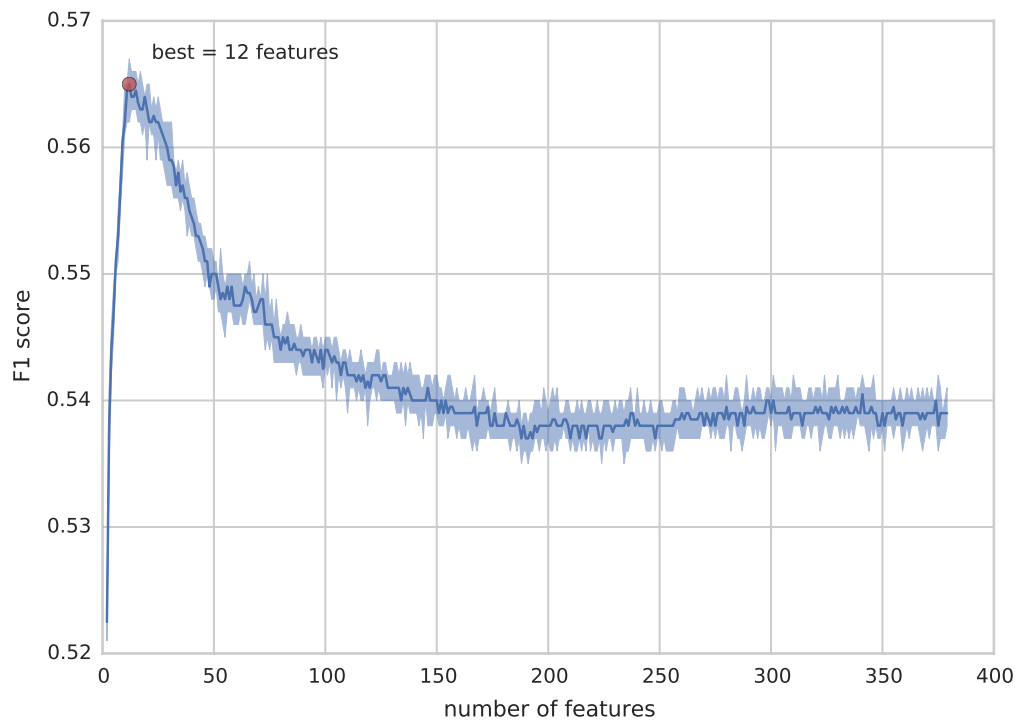

**Figure S2.** RFE scores (**CHECK** dataset).

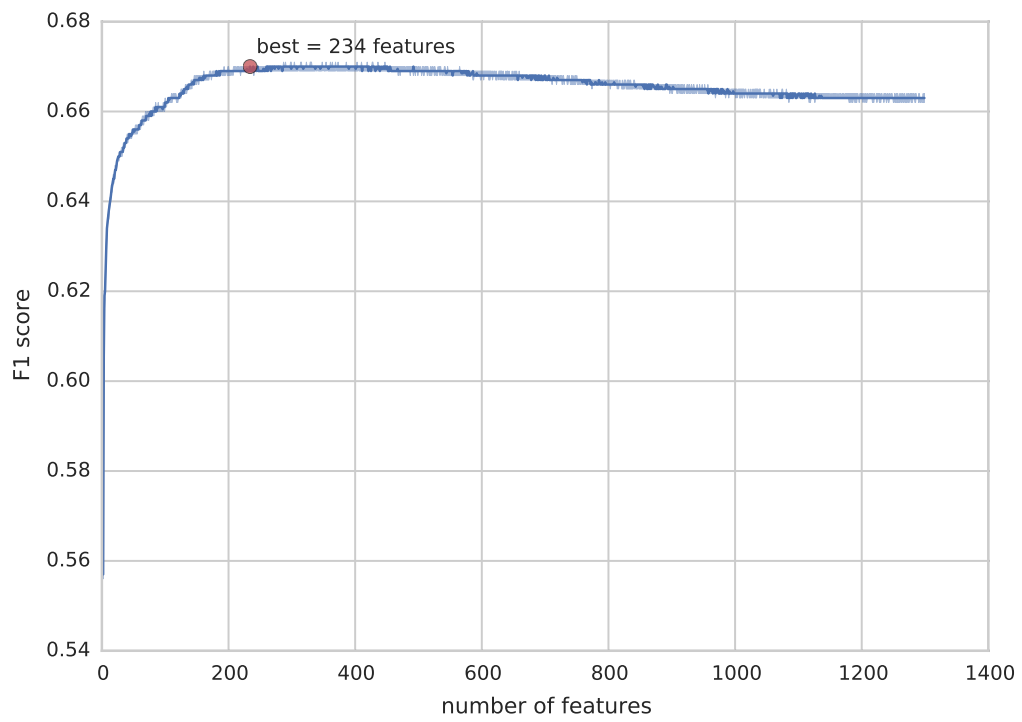

**Figure S3.** RFE scores (**OAI** dataset).

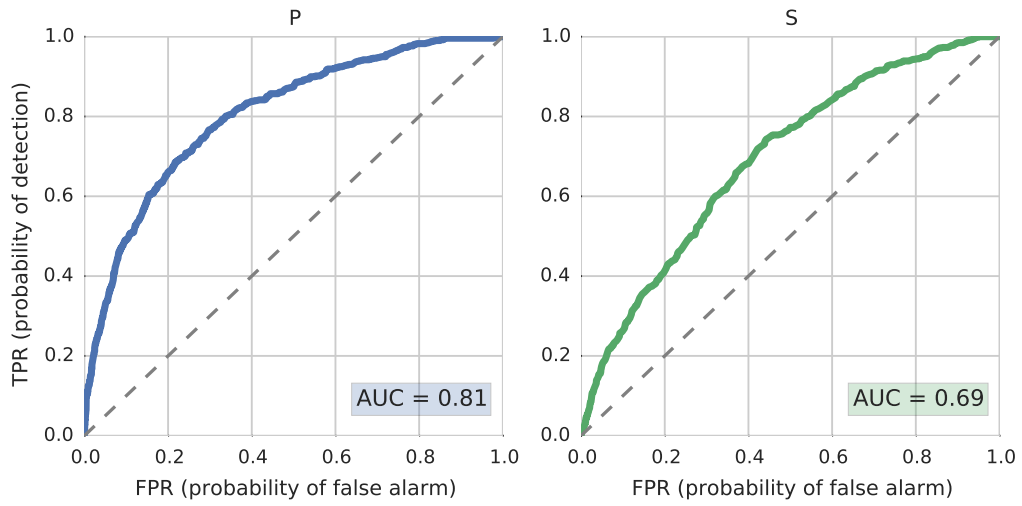

**Figure S4.** ROC curves for **P** and **S** sub-predictors of the best configuration of the *duo classifier* (**CHECK** dataset).

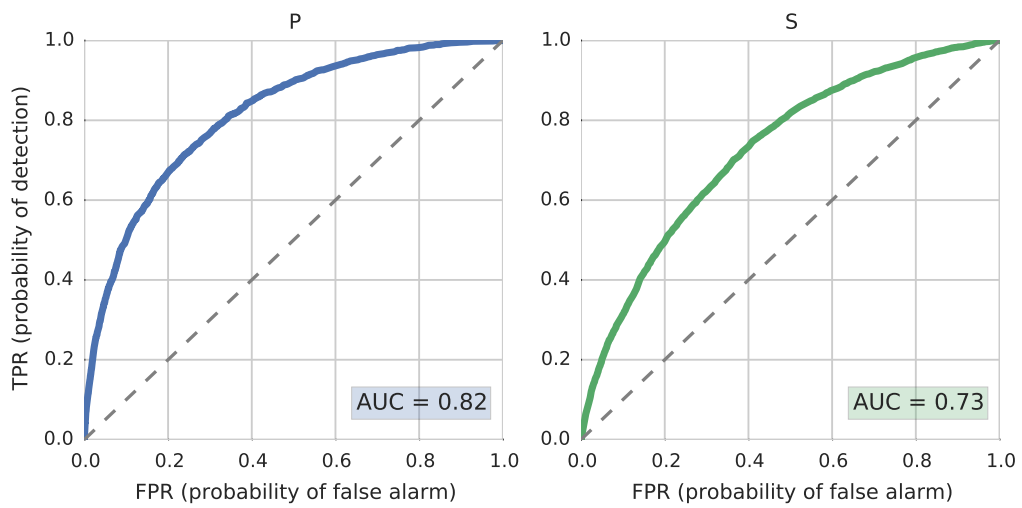

**Figure S5.** ROC curves for **P** and **S** sub-predictors of the best configuration of the *duo classifier* (**OAI** dataset).

**(a) CHECK dataset**

|                        |                                                       |
|------------------------|-------------------------------------------------------|
| AGE                    | age                                                   |
| b20                    | how good is your health today                         |
| BEN                    | <i>undocumented</i> (EQ-5D health survey)             |
| BMI                    | body mass index                                       |
| D02                    | knee/hip pain intensity right know                    |
| D03                    | knee/hip pain intensity last week                     |
| geen                   | not using medication                                  |
| HENDOL                 | left hip endorotation range of motion                 |
| HPIJN                  | hip pain                                              |
| HSTIJF                 | morning stiffness in the hip                          |
| I09a                   | do you feel limited in your role as a partner         |
| I09g                   | do you feel limited in fulfilling volunteering work   |
| KFLEXL                 | left knee flexion range of motion                     |
| KLAngleJoint           | left knee angle between the femur and tibia           |
| KL_FemurMeanMedmmAl    | left knee mean medial femur bone density              |
| KLMeanMedJSWmm         | left knee mean medial joint space width               |
| KLMinJSWmm             | left knee minimum total joint space width             |
| KLOsteophyteTibiaLatmm | left knee lateral tibia osteophyte area               |
| KLOsteophyteTibiaMedmm | left knee medial lateral tibia osteophyte area        |
| KL_TibiaMeanMedmmAl    | left knee mean medial tibia bone density              |
| KPIJN                  | knee pain                                             |
| KRAngleJoint           | right knee angle between the femur and tibia          |
| KRMeanMedJSWmm         | right knee mean medial joint space width              |
| KRMinJSWmm             | right knee minimum total joint space width            |
| KROsteophyteTibiaMedmm | right knee medial lateral tibia osteophyte area       |
| KRPeakMedmm            | right knee medial tibial eminence height              |
| KSTIJF                 | morning stiffness in the knee                         |
| mobility               | mobility (EQ-5D health survey)                        |
| MVH_A1                 | index based on MVH-A1 value set (EQ-5D health survey) |
| pain                   | pain or discomfort (EQ-5D health survey)              |
| PCIpiekr               | worrying (Pain Coping Inventory)                      |
| rfys                   | physical functioning (SF-36 health survey)            |
| rment                  | general mental health (SF-36 health survey)           |
| rpijn                  | bodily pain (SF-36 health survey)                     |
| rvit                   | vitality (SF-36 health survey)                        |
| wmfuns                 | physical functioning sub-score (WOMAC)                |
| wmpyns                 | pain sub-score (WOMAC)                                |
| wmstfs                 | stiffness sub-score (WOMAC)                           |
| wmtots                 | total score (WOMAC)                                   |

**(b) OAI dataset**

|             |                                                                             |
|-------------|-----------------------------------------------------------------------------|
| DFBCOLL     | difference in minutes between baseline and follow-up blood collection times |
| DFUCOLL     | difference in minutes between baseline and follow-up urine collection times |
| DILKN16     | difficulty of heavy chores in last week (WOMAC)                             |
| DIRKN12     | difficulty of lying down in teh last 7 days (WOMAC)                         |
| DIRKN6      | pain level while walking in the last 7 days (WOMAC)                         |
| GLCFQCV     | glucosamine frequency of use in past 6 months                               |
| HSPSS       | physical summary score (SF-12 health survey)                                |
| KGLRS       | how much the knee pain and arthritis affect you?                            |
| KIKBALL_3.0 | leg used to kick a bal                                                      |
| KOOSKPL     | left knee pain score (KOOS)                                                 |
| KOOSKPR     | right knee pain score (KOOS)                                                |
| KOOSQOL     | quality of life score (KOOS)                                                |
| KOOSYMR     | symptoms score (KOOS)                                                       |
| KPRKN2      | pain while fully straightening the knee in the last 7 days (KOOS)           |
| P7LKACV     | average left knee pain in the last 7 days                                   |
| P7LKRCV     | left knee pain severity in the last 7 days                                  |
| P7RKACV     | right knee pain severity in the last 7 days                                 |
| P7RKRCV     | average right knee pain in the last 7 days                                  |
| PMLKRCV     | left knee pain severity in the last 30 days                                 |
| PMRKRCV     | right knee pain severity in the last 30 days                                |
| S1_CFWIDTH  | width of femoral condyles used to define x = 1.0                            |
| S1_IMPIXSZ  | pixel size used for conversion to millimetres                               |
| S1_JSW150   | medial JSW at x = 0.15mm                                                    |
| S1_JSW175   | medial JSW at x = 0.175mm                                                   |
| S1_JSW200   | medial JSW at x = 0.2mm                                                     |
| S1_MCAJSW   | average medial joint space width                                            |
| S1_MCMJSW   | minimum medial joint space width                                            |
| S1_TMJSW    | total minimum joint space width                                             |
| S1_TPCFDS   | distance from tibial plateau to tibial rim closest to femoral condyle       |
| S2_IMPIXSZ  | pixel size used for conversion to millimetres                               |
| S2_JSW150   | medial JSW at x = 0.15mm                                                    |
| S2_JSW175   | medial JSW at x = 0.175mm                                                   |
| WOMADLL     | left knee disability score (WOMAC)                                          |
| WOMADLR     | right knee disability score (WOMAC)                                         |
| WOMKPL      | left knee pain score (WOMAC)                                                |
| WOMKPR      | right knee pain score (WOMAC)                                               |
| WOMTSL      | left knee total score (WOMAC)                                               |
| WOMTSR      | right knee total score (WOMAC)                                              |
| WPLKN3      | knee pain at night while in bed in the last 7 days                          |
| WPLKN4      | knee pain sitting or lying down in the last 7 days                          |

**Table S5.** Description of attributes shown in impact plots (FIGURES 6 to 9).

## List of attributes used in model training (after preprocessing)

### CHECK

A03, ADDUC, ADDUCL, ADDUCR, AGE, B18a, BAKERHK, BAKERKL, BAKERKR, BAKERLR, BAND, BANDHK, BANDKL, BANDKR, BANDLR, BEN, BMI, BOU2L, BOU2R, BOU3L, BOU3R, BOU4L, BOU4R, BOU5L, BOU5R, D01a, D02, D03, F01\_ha, HABDL, HABDPIJNL, HABDPIJNR, HABDR, HABDSTRTL, HABDSTRTR, HADDL, HADDPIJNL, HADDPIJNR, HADDR, HADDSTRTL, HADDSTRTR, HCONTRACL, HCONTRACR, HEB2L, HEB2R, HEB3L, HEB3R, HEB4L, HEB4R, HEB5L, HEB5R, HENDOL, HENDOPIJNL, HENDOPIJNR, HENDOR, HENDOSTRTL, HENDOSTRTR, HEXOL, HEXOPIJNL, HEXOPIJNR, HEXOR, HEXOSTRTL, HEXOSTRTR, HFLEXL, HFLEXPIJNL, HFLEXPIJNR, HFLEXR, HFLEXSTRTL, HFLEXSTRTR, HPIJNL, HPIJNR, HSTIJF, I09a, I09b, I09c, I09d, I09e, I09f, I09g, I09h, I09i, I10, I13a, I13b, I13c, I13d, I13e, I13f, I13g, I13h, I13i, I13j, I14, ILIO, ILIOL, ILIOR, INFRACT, INFRACTH, INFRACTHR, ITISRF, J01, J02a, J02b, J02c, J03, J04a, J04b, J04c, J04d, J04e, J04f, J04g, J04h, J04i, J04j, J04k, J04m, J05a, J05b, J05c, J05d, J05e, J06A, J06B, J06C, J06D, J06E, J06F, J06G, KBENIGL, KBENIGR, KCREPL, KCREPR, KDRUKPL, KDRUKPR, KEXTPIJNL, KEXTPIJNR, KEXTROML, KEXTROMR, KFLEXL, KFLEXPIJNL, KFLEXPIJNR, KFLEXR, KLAngleJoint, KLFemurMeanLatmmAl, KLFemurMeanMedmmAl, KLFemurMeanmmAl, KLLK, KLLatJSN, KLMeanJSWmm, KLMeanLatJSWmm, KLMeanMedJSWmm, KLMedJSN, KLMinJSWmm, KLOsteophyteFemurLatmm, KLOsteophyteFemurMedmm, KLOsteophyteTibiaLatmm, KLOsteophyteTibiaMedmm, KLPeakLatmm, KLPeakMedmm, KLTibiaMeanLatmmAl, KLTibiaMeanMedmmAl, KLTibiaMeanmmAl, KPATGRL, KPATGRR, KPIJN, KPIJNL, KPIJNR, KRAngleJoint, KREFILLL, KREFILLR, KR-FemurMeanLatmmAl, KR-FemurMeanMedmmAl, KR-FemurMeanmmAl, KRKL, KRLatJSN, KRMeanJSWmm, KRMeanLatJSWmm, KRMeanMedJSWmm, KRMedJSN, KRMinJSWmm, KROsteophyteFemurLatmm, KROsteophyteFemurMedmm, KROsteophyteTibiaLatmm, KROsteophyteTibiaMedmm, KRPeakLatmm, KRPeakMedmm, KRTibiaMeanLatmmAl, KRTibiaMeanMedmmAl, KRTibiaMeanmmAl, KSTIJF, KUITGL, KUITGR, KWARMTEL, KWARMTER, MVH\_A1, Missos, PClafei, PCleisen, PCPiekr, PCIpjn, PCTrust, PCIterug, QUAD, QUADL, QUADR, RADIC, RAS, SEPART, SEPARTHR, SEPARTK, SEXE, SLR, SLRL, SLRR, Sosfrec, Sosgem, Sosirec, Soskrec, TROCH, TROCHL, TROCHR, V18A, V18B, V18C, V18D, V18E, V18F, V18G, V18J, V18K, V18L, V18M, V18N, V18O, V18P, V18Q, V18R, V18S, V18T, V18U, V18V, V18W, V18X, V18Y, VISITNR, ZW01, ZW02, ZW03, ZW05agr, ZW05amb, ZW05tra, ZW07a, ZW07b, ZW07c, ZW07d, ZW07e, ZW07f, ZW07g, ZW3a, a08, anders, asp, b20, baker, comor, d01b, d01c, d01d, d01e, daily, f01\_andh, f01\_and, f01\_bedr, f01\_ergo, f01\_fys, f01\_geen, f01\_gmd, f01\_gzh, f01\_mw, f01\_oeft, f01\_orth, f01\_past, f01\_psy, f01\_reu, f01\_rev, f01\_wvk, geen, ibu, mobility, mood, pain, parac, rfys, rgezv, rment, rpjn, rfoem, rolfy, rsoe, rvit, selfcare, sosrec, sostal, study\_group, wmfuns, wmpyns, wmtots, wmtots, zw05adm, zw05and, zw05comm, zw05dnst, zw08adm, zw08agr, zw08amb, zw08and, zw08comm, zw08dnst, zw08tra, zw3b, zw3c, zw3d, zw3e, zw3f, zw3g.

### OAI

20MPACE, 400EXCL, 400MCPM, ABCIRC, ACUSCV, ACUTCVC, AGE, ARTDOC, ARTDRCV, ARTH12, ASTHMA, BISPHOS, BISPTYP, BLDCCOLL, BLDHRS1, BLDRAW1, BLDUPMNI, BMI, BMICAT, BONFX, BP30, BP30OFT, BPACTCV, BPARM, BPBAD, BPBEDCV, BPCFCS, BPDAYCV, BPDIA, BPSY, BPTOT, BRAC12, BRACCV, BYP-LEG, CAMI12, CANCER, CAPNSCV, CEMPLOY, CESD, CESD1, CESD10, CESD11, CESD12, CESD13, CESD14, CESD15, CESD16, CESD17, CESD18, CESD19, CESD2, CESD20, CESD3, CESD4, CESD5, CESD6, CESD7, CESD8, CESD9, CHIRCV, CHNFQCV, CHON, CITRATE, COMORB, COMPI0, COXIBS, CS5, CSPACE, CSTIME1, CSTIME2, CSTREP1, CSTREP2, CSTSGL, CUREMP, DFBCOLL, DFUCOLL, DIAB, DIASELG, DIET12, DIETCV, DILKNI, DILKNI10, DILKNI11, DILKNI12, DILKNI13, DILKNI14, DILKNI15, DILKNI16, DILKNI17, DILKN2, DILKN3, DILKN4, DILKN5, DILKN6, DILKN7, DILKN8, DILKN9, DIRKN1, DIRKN10, DIRKN11, DIRKN12, DIRKN13, DIRKN14, DIRKN15, DIRKN16, DIRKN17, DIRKN2, DILKN8, DILKN9, DIRKN1, DIRKN10, DIRKN11, DIRKN12, DIRKN13, DIRKN14, DIRKN15, DIRKN16, DIRKN17, DIRKN2, DIRKN3, DIRKN4, DIRKN5, DIRKN6, DIRKN7, DIRKN8, DIRKN9, DOXYCYC, EDTA, ESTR, EXCESS1, FALL, FALLCV, GLCFQCV, GLUC, GNRH, GT12CV, HEMAT1, HERB12, HERBCV, HOSPSUR, HOUACT1, HOUACT2, HOUACT3, HOUACT4, HOUACT5, HOUACT6, HOURSPI, HOURWK, HPL12CV, HPNL12, HPNR12, HPR12CV, HRELG, HRSUC1, HRTAT, HRTFAIL, HSMSS, HSPSS, HYAINJL, HYAINJR, HYINJCV, ID, ILLPWK1, INJL12, INJR12, ISOREQ, KEXAMK, KGLRS, KIDFXN, KIKBALL, KNINJ, KOOSFSR, KOOSFX1, KOOSFX4, KOOSFX5, KOOSKPL, KOOSKPR, KOOSQOL, KOOSYML, KOOSYMR, KPA30CV, KPACDCV, KPACT30, KPACTCV, KPL12CV, KPL30CV, KPLK20B, KPLK20D, KPLKN1, KPLKN2, KPLKN3, KPMED, KPMEDCV, KPNL12, KPNR12, KPR12CV, KPR30CV, KPRK20B, KPRK20D, KPRKN1, KPRKN2, KPRKN3, KQOL1, KQOL2, KQOL3, KQOL4, KSRGL12, KSRGR12, KSX, KSXLKN1, KSXLKN2, KSXLKN3, KSXLKN4, KSXLKN5, KSXRKN1, KSXRKN2, KSXRKN3, KSXRKN4, KSXRKN5, LEAKAG1, LEXCOMP, LEXP1CV, LEXP2CV, LEXPN, LFXCOMP, LFXP1CV, LFXP2CV, LFXPN, LIVDAM, LKABPN, LKALNMT, LKEFFB, LKEFFPT, LKLTTPN, LKMTTPN, LKP30CV, LKPFCRE, LKPGDPN, LKSX, LLWGT, LUNG, MASSCV, MAXCIRC, MISSWK, MRITEM3, MRSEQNL, MRSEQNR, MSM, MULTST1, NARCOT, NSAIKRX, NSAIK, OAB12CV, OAD12CV, OAF12CV, OAH12CV, OAO12CV, OTA12CV, OTTHRVP1, OTREASM, P30VITC, P30VITD, P30VITE, P30VT1, P30VT10, P30VT2, P30VT3, P30VT4, P30VT5, P30VT6, P30VT7, P30VT8, P30VT9, P7LKACV, P7LKF, P7LKRCV, P7RKACV, P7RKFR, P7RKRCV, PA130, PA130CV, PA130NF, PA230, PA230CV, PA330, PA330CV, PA430, PA430CV, PA530, PA530CV, PASE, PASE1, PASE1HR, PASE2, PASE2HR, PASE3, PASE4, PASE5, PASE6, PLAQHR1, PMLKRCV, PMRKRCV, PNMEDT, POLYRH, PTH, QOVPI, RA, RAI12, RASTAFU, REL12, RELACV, REMITM, REXCOMP, REXP1CV, REXP2CV, REXPN, RFXCOMP, RFXP1CV, RFXP2CV, RFXPN, RKABPN, RKALNMT, RKEFFB, RKEFFPT, RKLTPN, RKMTPN, RKP30CV, RKPFCRE, RKPDPN, RKXS, RLARM, RLBACK, RLHORIZ, RLLGTH, RLVERT, RLWGT, RPAVG, RUBCV, RUBS12, RX30, RX30NUM, RXACTM, RXANALG, RXASPRN, RXBISPH, RXCHOND, RXCLCTN, RXCLCXB, RXCOX2, RXFLUOR, RXGLCSM, RXIHYAL, RXISTRD, RXMSM, RX-NARC, RXNSAID, RXNTRAT, RXOSTRD, RXOTHAN, RXRALOX, RXRFCXB, RXSALIC, RXTPTRD, RXVIT\_D, RXVLCXB, S1\_CFWIDTH, S1\_IMPISXS, S1\_INCPLL, S1\_INCPML, S1\_INCPSTPS, S1\_JSW150, S1\_JSW175, S1\_JSW200, S1\_JSW225, S1\_JSW250, S1\_JSW275, S1\_JSW300, S1\_LCAJSW, S1\_LCMJSW, S1\_LJSW700, S1\_LJSW725, S1\_LJSW750, S1\_LJSW775, S1\_LJSW800, S1\_LJSW825, S1\_LJSW850, S1\_LJSW875, S1\_LJSW900, S1\_LTPMEBE, S1\_MCAJSW, S1\_MCMJSW, S1\_MJSWBB, S1\_NOLJSWX, S1\_NOLMIN, S1\_NOMJSWX, S1\_NOMMJSW, S1\_TAJSW, S1\_TMJSW, S1\_TPCFDS, S1\_XMJSW, S1\_XRATTL, S1\_XRATTM, S1\_XRCHL, S1\_XRCHM, S1\_XRCYFL, S1\_XRCYFM, S1\_XRCYTL, S1\_XRCYTM, S1\_XRJS, S1\_XRJS, S1\_XRKL, S1\_XROSFL, S1\_XROSF, S1\_XROSTL, S1\_XROSTM, S1\_XRSCL, S1\_XRSCLM, S1\_XRSCLT, S1\_XRSCTM, S2\_CFWIDTH, S2\_IMPISXS, S2\_INCPLL, S2\_INCPML, S2\_INCPSTPS, S2\_JSW150, S2\_JSW175, S2\_JSW200, S2\_JSW225, S2\_JSW250, S2\_JSW275, S2\_JSW300, S2\_LCAJSW, S2\_LCMJSW, S2\_LJSW700, S2\_LJSW725, S2\_LJSW750, S2\_LJSW775, S2\_LJSW800, S2\_LJSW825, S2\_LJSW850, S2\_LJSW875, S2\_LJSW900, S2\_LTPMEBE, S2\_MCAJSW, S2\_MCMJSW, S2\_MJSWBB, S2\_NOLJSWX, S2\_NOLMIN, S2\_NOMJSWX, S2\_NOMMJSW, S2\_TAJSW, S2\_TMJSW, S2\_TPCFDS, S2\_XMJSW, S2\_XRATTL, S2\_XRATTM, S2\_XRCHL, S2\_XRCHM, S2\_XRCYFL, S2\_XRCYFM, S2\_XRCYTL, S2\_XRCYTM, S2\_XRJS, S2\_XRJS, S2\_XRKL, S2\_XROSFL, S2\_XROSF, S2\_XROSTL, S2\_XROSTM, S2\_XRSCL, S2\_XRSCLM, S2\_XRSCLT, S2\_XRSCTM, S2\_XRSCTM, SAME, SEAQHR1, SERUM, SF1, SF10, SF11, SF12, SF2, SF3, SF4, SF5, SF6, SF7, SF8, SF9, SMRIELG, SPIR12, SPIRCV, SREPHR, SREPLKR, SREPRKR, SRGSTAT, STEPST1, STEPST2, STINJCV, STRINJL, STRINJR, STROKE, SYSELG, TIMET1, TIMET2, TRANSET, TYLEN, ULCEP, URINHR1, URINOB1, URNCOLL, URUPMNI, VCOLL1, VEIN1, VITM12, VITMOCV, VOID1, W20COMP, WALKER, WEEKWK, WEIGHT, WKHR7CV, WLK20T1, WLK20T2, WLK20T3, WLKAID, WOMADLL, WOMADLR, WOMKPL, WOMKPR, WOMSTFL, WOMSTFR, WOMTSL, WOMTSR, WORK7, WORKAMT, WPLKN1, WPLKN2, WPLKN3, WPLKN4, WPLKN5, WPRKN1, WPRKN2, WPRKN3, WPRKN4, WPRKN5, WSLKN1, WSLKN2, WSRKN1, WSRKN2, YOGA12, YOGACV.
